# Supplementary material for: Hyperinvasive Meningococci Induce Intra-nuclear Cleavage of the NF-κB Protein p65/RelA by Meningococcal IgA Protease
Source: PubMed Central journal article supplement (PMC4524725; doi:10.1371/journal.ppat.1005078), 2015-08-04
Supplement: ppat.1005078.s001.pdf [file ppat.1005078.s001.pdf]

**Table S1 *N. meningitidis* strains used in this study.**

| Strain                   | Characteristics: Serogroup :Serotype :Serosubtype (cc <sup>1</sup> ) | Isolation site   | Origin            |
|--------------------------|----------------------------------------------------------------------|------------------|-------------------|
| <b>ST-11 isolates</b>    |                                                                      |                  |                   |
| LNP13143                 | W: 2a: P1.5,2 (cc:11)                                                | CSF <sup>2</sup> | NRCM <sup>3</sup> |
| LNP 17592                | W: 2a: P1.5,2 (cc:11)                                                | Blood            | NRCM              |
| LNP19008                 | C: 2a: P1.5, 2 (cc:11)                                               | Blood            | NRCM              |
| LNP 19995                | W: 2a:P1.5, 2 (cc:11)                                                | CSF              | NRCM              |
| LNP 20342                | B: 2a: P1. 5 (cc:11)                                                 | CSF              | NRCM              |
| LNP 20553                | C: 2a: P1.5 (cc:11)                                                  | CSF              | NRCM              |
| LNP21515                 | C:2a: P1. 5 (cc:11)                                                  | CSF              | NRCM              |
| LNP21678                 | C:2a: P1. 5 (cc:11)                                                  | Blood            | NRCM              |
| LNP21996                 | B: 2a: P1.5 (cc:11)                                                  | Blood            | NRCM              |
| LNP24198                 | C:2a:P1.7, 1 (cc:11)                                                 | Blood            | NRCM              |
| LNP25496                 | C: 2a: P1.5 (cc:11)                                                  | CSF              | NRCM              |
| LNP25501                 | C:2a:P1.5 (cc:11)                                                    | CSF              | NRCM              |
| LNP25512                 | C:NT <sup>4</sup> : NST <sup>5</sup> (cc:11)                         | Blood            | NRCM              |
| LNP25516                 | C: 2a: P1.5 (cc:11)                                                  | Blood            | NRCM              |
| LNP25524                 | C:2a: P1. 5 (cc:11)                                                  | Blood            | NRCM              |
| LNP26653                 | C:15: P1.4 (cc:11)                                                   | Blood            | NRCM              |
| LNP27531                 | W:14: P1. 5, 2 (cc:11)                                               | Synovial fluid   | NRCM              |
| LNP27557                 | B: NT: P1. 7, 1 (cc:11)                                              | Blood            | NRCM              |
| LNP27564                 | W: 2a: P1.5, 2 (cc:11)                                               | Blood            | NRCM              |
| <b>Carriage isolates</b> |                                                                      |                  |                   |
| LNP117                   | NG <sup>6</sup> :NT:P1.6 (cc:22)                                     | Nasopharynx      |                   |
| LNP124                   | NG: 15: P1.6 (cc:NA <sup>7</sup> )                                   | Nasopharynx      | NRCM              |
| LNP128                   | NG: 1: P1.6 (cc:41/44)                                               | Nasopharynx      | NRCM              |
| LNP133                   | 29E: NT: P1.5, 2 (cc: 60)                                            | Nasopharynx      | NRCM              |
| LNP280                   | B: NT: P1.9 (cc: 41/44)                                              | Nasopharynx      | NRCM              |
| LNP292                   | Y: 15: P1.16 (cc:174)                                                | Nasopharynx      | NRCM              |
| LNP597                   | NG: 1: P1.6 (cc: 41/44)                                              | Nasopharynx      | NRCM              |
| LNP858                   | B: 1: P1.6 (cc: 461)                                                 | Nasopharynx      | NRCM              |

|                                                |                                                                                                                                                                                  |               |            |
|------------------------------------------------|----------------------------------------------------------------------------------------------------------------------------------------------------------------------------------|---------------|------------|
| LNP1128                                        | B: 1: P1.14 (cc: 213)                                                                                                                                                            | Nasopharynx   | NRCM       |
| LNP1185                                        | NG: NT:NST: (cc:NA)                                                                                                                                                              | Nasopharynx   | NRCM       |
| LNP1407                                        | B: NT: P1.14 (cc: 213)                                                                                                                                                           | Nasopharynx   | NRCM       |
| LNP1632                                        | B: 15: P1.7, 16 (cc: 32)                                                                                                                                                         | Nasopharynx   | NRCM       |
| LNP1769                                        | NG: 15: P1.6 (cc: NA)                                                                                                                                                            | Nasopharynx   | NRCM       |
| LNP2073                                        | B: 4: P1.14 (cc: 162)                                                                                                                                                            | Nasopharynx   | NRCM       |
| LNP2404                                        | B: NT: NST (cc: 41/44)                                                                                                                                                           | Nasopharynx   | NRCM       |
| LNP3174                                        | NG: 15: P1.6 (cc: NA)                                                                                                                                                            | Nasopharynx   | NRCM       |
| LNP 20642                                      | C: NT: NST (cc: 334)                                                                                                                                                             | Expectoration | NRCM       |
| LNP 21019                                      | B: NT:P1.14 (cc: 35)                                                                                                                                                             | Expectoration | NRCM       |
| <b>Recombinant meningococcal strains</b>       |                                                                                                                                                                                  |               |            |
| 1999 $\Delta$ <i>iga</i>                       | Isogenic mutant of the invasive isolate LNP19995, deficient in IgA protease expression ( <i>iga::aad</i> ), Spec <sup>R8</sup>                                                   | N/A           | This study |
| 21019 $\Delta$ <i>iga</i>                      | Isogenic mutant of the carriage isolate LNP21019, deficient in IgA protease expression ( <i>iga::aad</i> ), Spec <sup>R</sup>                                                    | N/A           | This study |
| 19995 $\Delta$ <i>iga/iga</i> <sub>19995</sub> | Recombinant strain that resulted from substitution of chromosomal <i>iga::aad</i> copy of 19995 $\Delta$ <i>iga</i> with intact <i>iga</i> allele of LNP19995, Ery <sup>R9</sup> | N/A           | This study |
| 19995 $\Delta$ <i>iga/iga</i> <sub>21019</sub> | Recombinant strain that resulted from substitution of chromosomal <i>iga::aad</i> copy of 19995 $\Delta$ <i>iga</i> with intact <i>iga</i> allele of LNP21019, Ery <sup>R</sup>  | N/A           | This study |
| 21019 $\Delta$ <i>iga/iga</i> <sub>19995</sub> | Recombinant strain that resulted from substitution of chromosomal <i>iga::aad</i> copy of 21019 $\Delta$ <i>iga</i> with intact <i>iga</i> allele of LNP19995, Ery <sup>R</sup>  | N/A           | This study |
| 21019 $\Delta$ <i>iga/iga</i> <sub>21019</sub> | Recombinant strain that resulted from substitution of chromosomal <i>iga::aad</i> copy of 21019 $\Delta$ <i>iga</i> with intact <i>iga</i> allele of LNP21019, Ery <sup>R</sup>  | N/A           | This study |
| 19995GFP                                       | Recombinant strain isogenic of LNP19995, expressing constitutively a chromosomal copy of green fluorescent protein GFP                                                           | N/A           | (18)       |

1 : Clonal complex, 2 : Cerebrospinal fluid, 3 : National Reference Centre for Meningococci, 4 : Non-typeable, 5 : Non-serosubtypeable, 6 : Non-groupeable, 7 : Non assigned, 8 : Spectinomycin resistant, 9: Erythromycin resistant.
