# Supplementary material for: Hyperinvasive Meningococci Induce Intra-nuclear Cleavage of the NF-κB Protein p65/RelA by Meningococcal IgA Protease
Source: PubMed Central journal article supplement (PMC4524725; doi:10.1371/journal.ppat.1005078), 2015-08-04
Supplement: ppat.1005078.s002.pdf [file ppat.1005078.s002.pdf]

**Table S2 Primers used in this study.**

| <b>Primer</b> | <b>Sequence</b>                                   | <b>Features</b>                                                                                                                                                      |
|---------------|---------------------------------------------------|----------------------------------------------------------------------------------------------------------------------------------------------------------------------|
| iga5'Fw       | 5'-TAACGCCATATCCTTATCC-3'                         | Coding strand of <i>iga5'</i> fragment (corresponding to position 24 to 48 of MC58 <i>iga</i> orf)                                                                   |
| iga5'Rev      | 5'-GAAAAACGGTTTTTATCTTT                           | Non-coding strand of <i>iga5'</i> fragment (corresponding to position 538 to 557 of MC58 <i>iga</i> orf)                                                             |
| iga3'FwEcoRI  | 5'-ATCGAAT <u>TCCG</u> GCGATATTGGTGCAGGCAGCTTG-3' | Coding strand of <i>iga3'</i> fragment (corresponding to position 4188 to 4212 of MC58 <i>iga</i> orf) harbouring <i>EcoRI</i> adaptor site (underlined sequence)    |
| iga3'RevNcoI  | 5'- <u>CCCC</u> CATGGTTAGAAACGAATCTGTATTT-3'      | Non-coding strand of <i>iga3'</i> fragment (corresponding to position 4662 to 4686 of MC58 <i>iga</i> orf) harbouring <i>NcoI</i> adaptor site (underlined sequence) |
| aad1          | 5'-TGCGCTCACGCAACTGGTCCA-3'                       | Coding strand of spectinomycin resistance cassette <i>aadA</i>                                                                                                       |
| aad2          | 5'AGCTTGCCGTCTGAAGAATTCCCGGGGATCCGGTG-3'          | Non-coding strand of spectinomycin resistance cassette <i>aadA</i> with up-take sequence ( <i>italic</i> )                                                           |
| ERAM-1        | 5'-GCAAACCTTAAGAGTGTGTTGA-3'                      | Coding strand of erythromycin resistance cassette <i>erm</i>                                                                                                         |
| ERAM-3        | 5'-AGCTTGCCGTCTGAATGGGACCTCTTTAGCTTCT-3'          | Non-coding strand of erythromycin resistance cassette <i>erm</i> , with up-take sequence ( <i>italic</i> )                                                           |
| alphaFwBsa    | 5'- GCTGGTCTCC <u>CA</u> TGAGCCCGCAGGCAAATCA-3'   | Coding strand of $\alpha$ -peptide region harbouring <i>BsaI</i> adaptor site (underlined sequence)                                                                  |
| alphaRevXho   | 5'- CACCTCGAGGGTATTGGTGCTGACTGCATC-3'             | Non-coding strand of $\alpha$ -peptide region harbouring <i>XhoI</i> adaptor site (underlined sequence)                                                              |
| igapFwBsa     | 5'-GCTGGTCTCC <u>CA</u> TGGCATTGGTCAGAGACGATG-3'  | Coding strand of IgA protease sub-domain harbouring <i>BsaI</i> adaptor site (underlined sequence)                                                                   |

|                   |                                        |                                                                                                          |
|-------------------|----------------------------------------|----------------------------------------------------------------------------------------------------------|
| igapRevXho        | 5'-CACCTCGAGAGGCGGTGCGACGACGATATT-3'   | Non-coding strand of IgA protease sub-domain harbouring <i>Xho</i> I adaptor site (underlined sequence)  |
| alphaFwNhe        | 5'- GCTGCTAGCATGAGCCCGCAGGCAAATCA-3'   | Coding strand of $\alpha$ -peptide region harbouring <i>Nhe</i> I adaptor site (underlined sequence)     |
| alphaRevSma       | 5'-CACCCCGGGGTATTGGTGCTGACTGCATC-3'    | Non-coding strand of $\alpha$ -peptide region harbouring <i>Sma</i> I adaptor site (underlined sequence) |
| igapFwNhe         | 5'-GCTGCTAGCATGGCATTGGTCAGAGACGATG-3'  | Coding strand of IgA protease sub-domain harbouring <i>Nhe</i> I adaptor site (underlined sequence)      |
| igapRevSma        | 5'-CACCCCGGGAGGCGGTGCGACGACGATATT-3'   | Non-coding strand of IgA protease sub-domain harbouring <i>Sma</i> I adaptor site (underlined sequence)  |
| trpBFw            | 5'-GGGTAAAAACGCGTCATCG-3'              | Coding strand of meningococcal <i>trpB</i> gene                                                          |
| trpBRev           | 5'-GCGATTTCCAATGCGTGATT-3'             | Non-coding strand of meningococcal <i>trpB</i> gene                                                      |
| porA0             | 5'-GATGTCAGCCTATACGGCGAAATCAA-3'       | 5' of the coding strand of <i>porA</i>                                                                   |
| porA101           | 5'-GCCGATAAACGAGCCGAAATC-3'            | 3' of the non-coding strand of <i>porA</i>                                                               |
| igadownFw-Nco     | 5'-GGGCCCCCATGGAATACTAAATTCATAGCAAA-3' | Coding strand downstream <i>iga</i> stop codon                                                           |
| igadownRev        | 5'-CCTCGTCCGTCTGATATAGT-3'             | Non-coding strand downstream <i>iga</i> stop codon                                                       |
| nalPKOFw          | 5'-ACGGCTATAACGAAAATTAC-3'             | Coding strand <i>nalP</i>                                                                                |
| nalPKORev         | 5'-TAATGCTGTCGGTTTTTGC-3'              | Non-coding strand <i>nalP</i>                                                                            |
| igamutRev         | 5'-TAATGGTGAACCGACATCGCCTAACA-3'       | Non-coding strand of <i>iga</i> with CT to AC replacement of active site (underlined)                    |
| $\beta$ -actinFw  | 5'- GACTTAGTTGCGTTACACCCTTTC-3'        | $\beta$ -actin coding strand (Accession number <a href="#">NM_001101.3</a> )                             |
| $\beta$ -actinRev | 5'- CTGCTGTCACCTTCACCGTTC-3'           | $\beta$ -actin non-coding strand                                                                         |
| TNF- $\alpha$ Fw  | 5'- AGCTGGAGAAGGGTGACCGA-3'            | TNF- $\alpha$ coding strand (Accession number: <a href="#">NM_000594</a> )                               |
| TNF- $\alpha$ Rev | 5'- CAGGGCAATGATCCCAAAGTA-3'           | TNF- $\alpha$ non-coding strand                                                                          |
| IL-8Fw            | 5'- AGACATACTCCAAACCTTCCACC-3'         | IL-8 coding strand (Accession number <a href="#">NM_000584</a> )                                         |

|         |                              |                                                 |
|---------|------------------------------|-------------------------------------------------|
| IL-8Rev | 5'ACAACCCTCTGCACCCAGTT-3'    | IL-8 non-coding strand                          |
| FLIPFw  | 5'-AGAGTGAGGCGATTTGACCTG-3   | c-FLIP coding strand (Accession number HS00094) |
| FLIPRev | 5'- -AAGGTGAGGGTTCCTGAGCA-3' | c-FLIP non-coding strand                        |
