# Supplementary material for: Hyperinvasive Meningococci Induce Intra-nuclear Cleavage of the NF-κB Protein p65/RelA by Meningococcal IgA Protease
Source: PubMed Central journal article supplement (PMC4524725; doi:10.1371/journal.ppat.1005078), 2015-08-04
Supplement: ppat.1005078.s008.pdf [file ppat.1005078.s008.pdf]

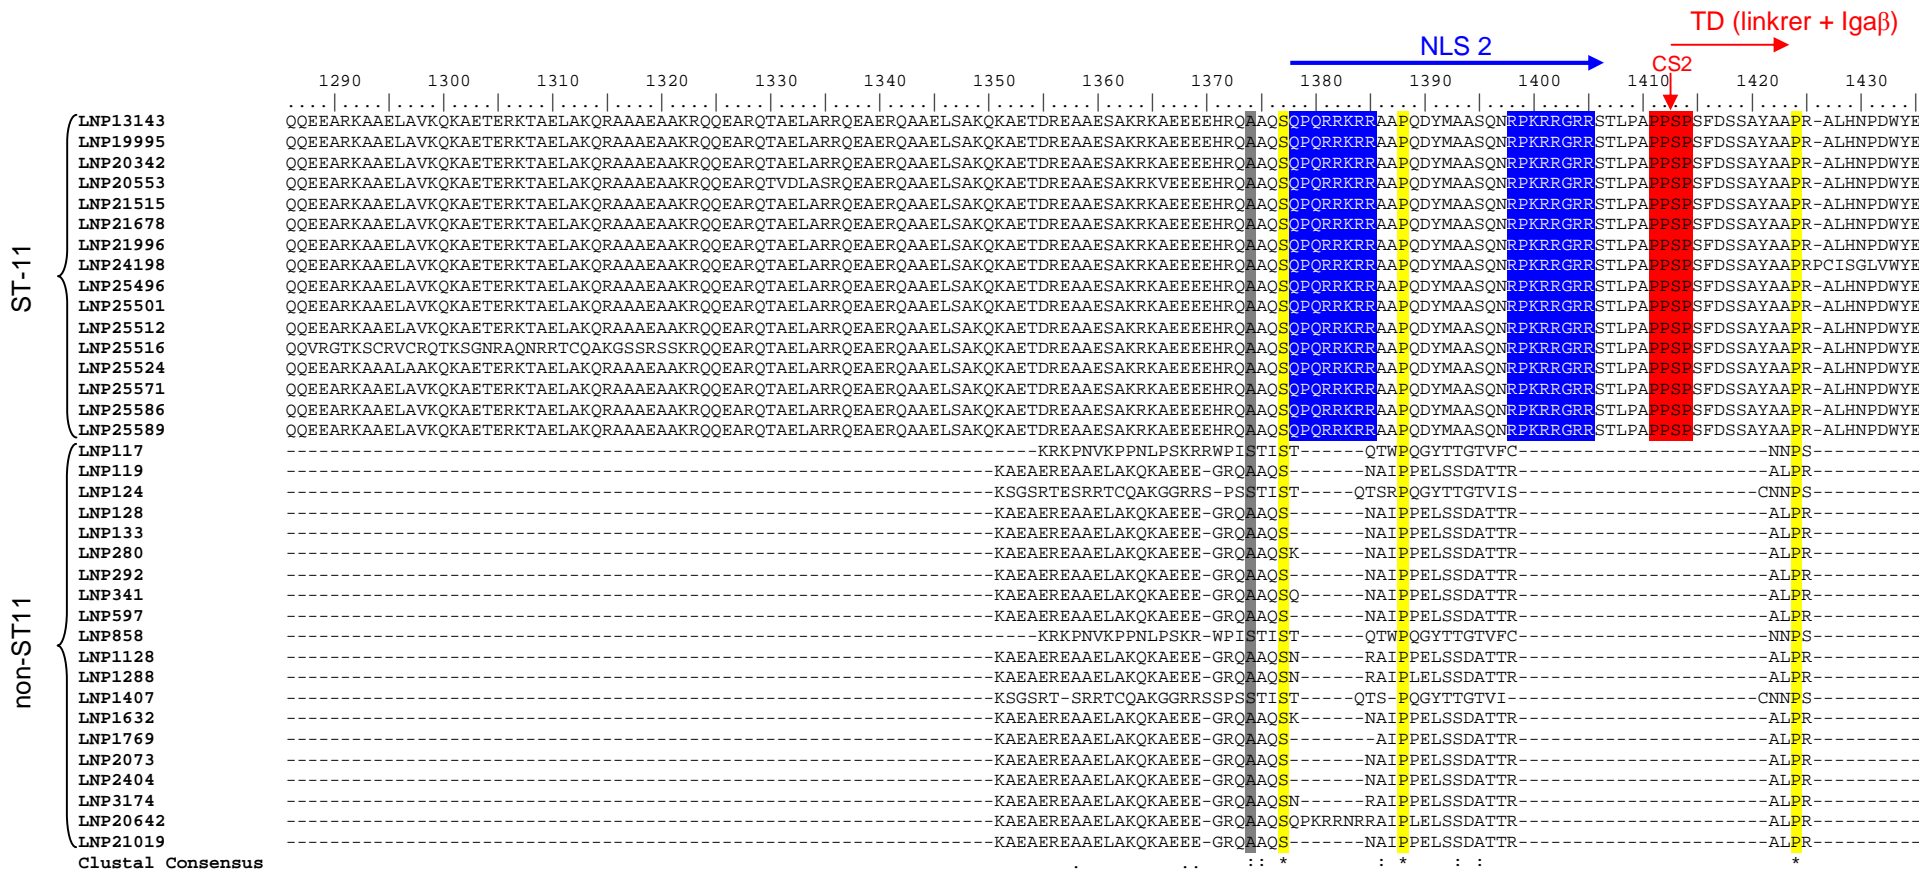

.....:.....\*.....\*.....\*
